# Supplementary material for: Distribution, sources, and potential toxicological significance of PAHs in drinking water sources within the Pearl River Delta
Source: Royal Society of Chemistry journal article supplement (doi:10.1039/c0em00542h), 2011-01-01
Supplement: c0em00542h.pdf [file c0em00542h.pdf]

## Supplementary Information

**MANUSCRIPT TITLE:** Distribution, sources, and potential toxicological significance of PAHs in drinking water sources within the Pearl River Delta

**AUTHORS:** Taicheng An,<sup>\*a</sup> Meng Qiao,<sup>a,b</sup> Guiying Li,<sup>a</sup> Hongwei Sun,<sup>a,b</sup> Xiangying Zeng,<sup>a</sup> Jiamo Fu,<sup>a</sup>

**ADDRESS:** <sup>a</sup> *State Key Laboratory of Organic Geochemistry and Guangdong Key Laboratory of Environmental Resources Utilization and Protection, Guangzhou Institute of Geochemistry, Chinese Academy of Sciences, Guangzhou 510640, China*

<sup>b</sup> *Graduate School of Chinese Academy of Sciences, Beijing 100049, China*

**JOURNAL:** *Journal of Environmental Monitoring*

**FIGURES:** 4

**TABLES:** 4

**NO. OF PAGES:** 10

\* Corresponding author: Taicheng An

Tel: 86-20-85291501

Fax: 86-20-85290706

E-mail address: [antc99@gig.ac.cn](mailto:antc99@gig.ac.cn)

### Source identification

Due to the wide-spread sources of PAHs, the possible sources of PAHs in the drinking source water within this region were also determined *via* conventional reported methods<sup>1-5</sup>. According to these references, the ratios between pairs of individual PAHs are often employed to determine the sources of PAHs. Four groups of isomers have been documented: Ant and Phe with the same molecular weight of 178, Flua and Pyr with the same molecular weight of 202, BaA and Chry with the same molecular weight of 228, and *IncdB* and *BghiP* with the same molecular weight of 276. If  $\text{Ant}/(\text{Ant} + \text{Phe}) < 0.1$ , PAH sources mainly originated from petroleum discharges. If  $\text{Ant}/(\text{Ant} + \text{Phe}) > 0.1$ , PAH sources mainly originated from combustion<sup>2</sup>. If  $\text{Flua}/(\text{Flua} + \text{Pyr}) < 0.4$ , PAH sources mainly originated from petroleum emissions, and if  $0.4 < \text{Flua}/(\text{Flua} + \text{Pyr}) < 0.5$ , PAHs sources originated from both petroleum discharges and combustion of its refined products. If  $\text{Flua}/(\text{Flua} + \text{Pyr}) > 0.5$ , the source originated from wood and coal combustion<sup>2</sup>. If  $\text{BaA}/(\text{BaA} + \text{Chry}) < 0.2$ , the main sources of PAHs originated from petroleum discharges, and if  $0.2 < \text{BaA}/(\text{BaA} + \text{Chry}) < 0.35$ , PAH sources originated from both petroleum discharges and combustion. If  $\text{BaA}/(\text{BaA} + \text{Chry}) > 0.35$ , only combustion is considered the PAH source<sup>5</sup>. If  $\text{IncdB}/(\text{IncdB} + \text{BghiP}) < 0.2$ , PAHs sources mainly originated from petroleum discharges, and if  $0.2 < \text{IncdB}/(\text{IncdB} + \text{BghiP}) < 0.5$ , PAH sources originated from petroleum combustion. Finally, if  $\text{IncdB}/(\text{IncdB} + \text{BghiP}) > 0.5$ , PAH sources originated from wood and coal combustion<sup>5</sup>.

**Table S1**  
 Physical and chemical parameters of 15 water samples (60 L of each)

| City      | Sample | Wet season |            |           |           | Dry season |            |           |           |
|-----------|--------|------------|------------|-----------|-----------|------------|------------|-----------|-----------|
|           |        | PH         | TSS (mg/L) | DOC(mg/L) | POC(mg/L) | PH         | TSS (mg/L) | DOC(mg/L) | POC(mg/L) |
| Guangzhou | YG     | 7.87       | 11.07      | 4.49      | 2.74      | 7.86       | 18.75      | 2.13      | 1.54      |
|           | XC     | 8.5        | 63.7       | 5.15      | 7.03      | 8.58       | 75.32      | 13.96     | 14.52     |
|           | JG     | 7.72       | 98.25      | 1.39      | 1.88      | 8.15       | 18.82      | 3.60      | 2.56      |
|           | YJS    | 7.3        | 19.06      | 1.45      | 0.64      | 8.25       | 13.79      | 2.72      | 1.09      |
|           | SHD    | 7.28       | 26.12      | 2.02      | 1.36      | 7.81       | 15.54      | 1.01      | 0.46      |
|           | LWZ    | 7.27       | 49.46      | 0.97      | 1.02      | 7.28       | 14.26      | 0.94      | 0.39      |
| Huizhou   | HZH    | 7.86       | 12.27      | 0.79      | 0.30      | 7.17       | 10         | 0.51      | 0.29      |
| Dongguan  | DG     | 7.2        | 9.41       | 1.09      | 0.31      | 7.68       | 26.35      | 0.68      | 0.44      |
|           | YT     | 7.67       | 32.94      | 1.47      | 1.51      | 7.78       | 26.79      | 0.96      | 1.20      |
| Shenzhen  | SHZH   | 7.37       | 25.51      | 1.19      | 0.73      | 7.41       | 24.23      | 0.60      | 0.89      |
| Foshan    | FSH    | 8.31       | 18.88      | 1.21      | 0.51      | 7.78       | 11.65      | 1.02      | 0.85      |
| Zhaoqing  | ZHQ    | 8.56       | 6.9        | 1.40      | 0.20      | 7.99       | 14.5       | 1.26      | 1.09      |
| Zhongshan | ZHSH   | 8.16       | 10.92      | 1.96      | 0.35      | 8.26       | 11.54      | 0.86      | 0.31      |
| Jiangmen  | JM     | 8.6        | 12.67      | 1.37      | 0.42      | 7.91       | 7.94       | 0.78      | 0.42      |
| Zhuhai    | ZHH    | 8.18       | 31.02      | 2.77      | 0.95      | 7.84       | 18.06      | 1.39      | 0.84      |

TSS, total suspended solid; DOC, dissolved organic carbon; POC, particulate organic carbon

Table S2

Recoveries of surrogate standards

| Surrogate standard           | Dissolved phase |        |        | Particulate phase |        |        |
|------------------------------|-----------------|--------|--------|-------------------|--------|--------|
|                              | Average         | SD     | RSD    | Average           | SD     | RSD    |
| <i>d</i> <sub>8</sub> -Nap   | 58.50%          | 28.55% | 48.80% | 83.24%            | 35.23% | 42.32% |
| <i>d</i> <sub>10</sub> -Ace  | 64.48%          | 22.44% | 34.80% | 81.76%            | 21.63% | 26.46% |
| <i>d</i> <sub>10</sub> -Phe  | 100.37%         | 22.66% | 22.57% | 82.75%            | 22.07% | 26.68% |
| <i>d</i> <sub>12</sub> -Chry | 85.74%          | 28.06% | 32.72% | 108.84%           | 39.78% | 36.55% |
| <i>d</i> <sub>12</sub> -Pey  | 97.24%          | 36.97% | 38.02% | 92.52%            | 35.46% | 38.33% |

Table S3a

The ranges of PAHs concentrations detected in fifteen water samples both in dissolved phase and particulate phase in wet season

| Wet   | Dissolved phase |            |             |                         | Particulate phase |            |             |                         |
|-------|-----------------|------------|-------------|-------------------------|-------------------|------------|-------------|-------------------------|
|       | Min (ng/L)      | Max (ng/L) | Mean (ng/L) | Detection Frequency (%) | Min (ng/L)        | Max (ng/L) | Mean (ng/L) | Detection Frequency (%) |
| Ace   | 0.33            | 7.15       | 1.73        | 100.00                  | 0.32              | 23.66      | 2.29        | 100.00                  |
| Dih   | 0.48            | 25.13      | 3.97        | 100.00                  | 0.22              | 42.76      | 3.55        | 100.00                  |
| Flu   | 4.57            | 80.25      | 15.99       | 100.00                  | 0.63              | 191.23     | 16.13       | 100.00                  |
| Phe   | 13.44           | 346.26     | 51.99       | 100.00                  | 2.29              | 896.47     | 67.56       | 100.00                  |
| Ant   | 0.95            | 54.85      | 8.23        | 100.00                  | 0.39              | 102.35     | 7.80        | 100.00                  |
| Flua  | 0.39            | 42.76      | 8.71        | 100.00                  | 0.75              | 593.88     | 43.75       | 100.00                  |
| Pyr   | 0.69            | 78.66      | 12.85       | 100.00                  | 0.86              | 642.70     | 47.49       | 100.00                  |
| BaA   | 0.52            | 30.90      | 3.93        | 100.00                  | 0.65              | 72.45      | 6.68        | 100.00                  |
| Chry  | 0.69            | 45.23      | 6.92        | 100.00                  | 0.72              | 207.55     | 16.87       | 100.00                  |
| BbF   | 0.43            | 19.85      | 4.26        | 100.00                  | 0.83              | 65.10      | 7.09        | 100.00                  |
| BkF   | nd              | 12.90      | 1.73        | 93.33                   | 0.89              | 63.59      | 6.88        | 100.00                  |
| BaP   | nd              | 15.93      | 2.00        | 80.00                   | 0.76              | 40.76      | 4.77        | 100.00                  |
| IncdB | nd              | 10.03      | 1.23        | 60.00                   | 0.78              | 19.04      | 3.24        | 100.00                  |
| DiB   | 0.44            | 9.79       | 1.82        | 100.00                  | 0.45              | 20.53      | 2.19        | 100.00                  |
| BghiP | nd              | 8.22       | 1.06        | 86.67                   | 0.46              | 35.78      | 4.53        | 100.00                  |
| ∑PAHs | 32.03           | 754.76     | 126.42      |                         | 13.35             | 3017.82    | 240.80      |                         |

nd, not detected.

**Table S3b**

The ranges of PAHs concentrations detected in fifteen water samples both in dissolved phase and particulate phase in dry season

| Dry           | Dissolved phase |            |             |                         | Particulate phase |            |             |                         |           |
|---------------|-----------------|------------|-------------|-------------------------|-------------------|------------|-------------|-------------------------|-----------|
|               | Min (ng/L)      | Max (ng/L) | Mean (ng/L) | Detection Frequency (%) | Min (ng/L)        | Max (ng/L) | Mean (ng/L) | Detection Frequency (%) | Frequency |
| Ace           | nd              | 6.07       | 2.18        | 86.67                   | nd                | 0.76       | 0.17        | 40.00                   |           |
| Dih           | 1.24            | 4.38       | 2.18        | 100.00                  | 0.18              | 2.04       | 0.76        | 100.00                  |           |
| Flu           | 2.82            | 14.29      | 6.44        | 100.00                  | 0.66              | 7.55       | 2.54        | 100.00                  |           |
| Phe           | 11.57           | 33.20      | 21.64       | 100.00                  | 2.13              | 24.62      | 6.23        | 100.00                  |           |
| Ant           | nd              | 12.25      | 6.19        | 93.33                   | 0.289             | 3.71       | 1.77        | 100.00                  |           |
| Flua          | 5.06            | 15.55      | 11.41       | 100.00                  | 0.64              | 9.16       | 2.63        | 100.00                  |           |
| Pyr           | 3.28            | 19.02      | 11.80       | 100.00                  | 0.70              | 10.87      | 3.04        | 100.00                  |           |
| BaA           | nd              | 12.04      | 4.58        | 80.00                   | nd                | 2.68       | 0.72        | 73.33                   |           |
| Chry          | 0.71            | 12.61      | 7.15        | 100.00                  | 0.40              | 5.33       | 1.41        | 100.00                  |           |
| BbF           | nd              | 0.06       | 0.01        | 6.67                    | nd                | 1.41       | 0.35        | 40.00                   |           |
| BkF           | nd              | 0.04       | 0.01        | 6.67                    | nd                | 0.51       | 0.07        | 13.33                   |           |
| BaP           | nd              | 0.84       | 0.07        | 20.00                   | nd                | 1.35       | 0.21        | 26.67                   |           |
| IncdB         | nd              | 8.41       | 1.71        | 33.33                   | nd                | 1.31       | 0.45        | 93.33                   |           |
| DiB           | nd              | 11.12      | 0.77        | 20.00                   | nd                | 1.18       | 0.14        | 13.33                   |           |
| BghiP         | nd              | 7.40       | 2.46        | 46.67                   | nd                | 1.44       | 0.29        | 33.33                   |           |
| $\Sigma$ PAHs | 48.09           | 113.63     | 78.59       |                         | 8.56              | 69.60      | 20.78       |                         |           |

nd, not detected.

Table S4

Toxic equivalence factors of 15 PAHs

| Targets                           | TEF  | Targets                       | TEF   |
|-----------------------------------|------|-------------------------------|-------|
| Dibenzo[ <i>a,h</i> ]anthracene * | 5    | Benzo[ <i>g,h,i</i> ]perylene | 0.01  |
| Benzo[ <i>a</i> ]pyrene *         | 1    | Acenaphthene                  | 0.001 |
| Benzo[ <i>a</i> ]anthracene *     | 0.1  | Fluorene                      | 0.001 |
| Benzo[ <i>b</i> ]fluoranthene *   | 0.1  | Phenanthrene                  | 0.001 |
| Benzo[ <i>k</i> ]fluoranthene *   | 0.1  | Pyrene                        | 0.001 |
| Indeno[1,2,3- <i>cd</i> ]pyrene * | 0.1  | Fluranthene                   | 0.001 |
| Chresene *                        | 0.01 | Acenaphthylene                | 0.001 |
| Anthracene                        | 0.01 |                               |       |

Fig. S1. Levels of PAHs (particle and dissolved water phase) in other drinking water sources of China (Guo *et al. Chemosphere*, 2007, 68, 93-104; Doong *et al. Water Research*, 2004, 38, 1733-1744; Wang *et al. Chemosphere*, 2009, 75, 1119-1127; Ma *et al. Environ. Monitor. Assess.* 2008, 146, 127-138; Deng *et al. Chemosphere*, 2006, 64, 1401-1411.).

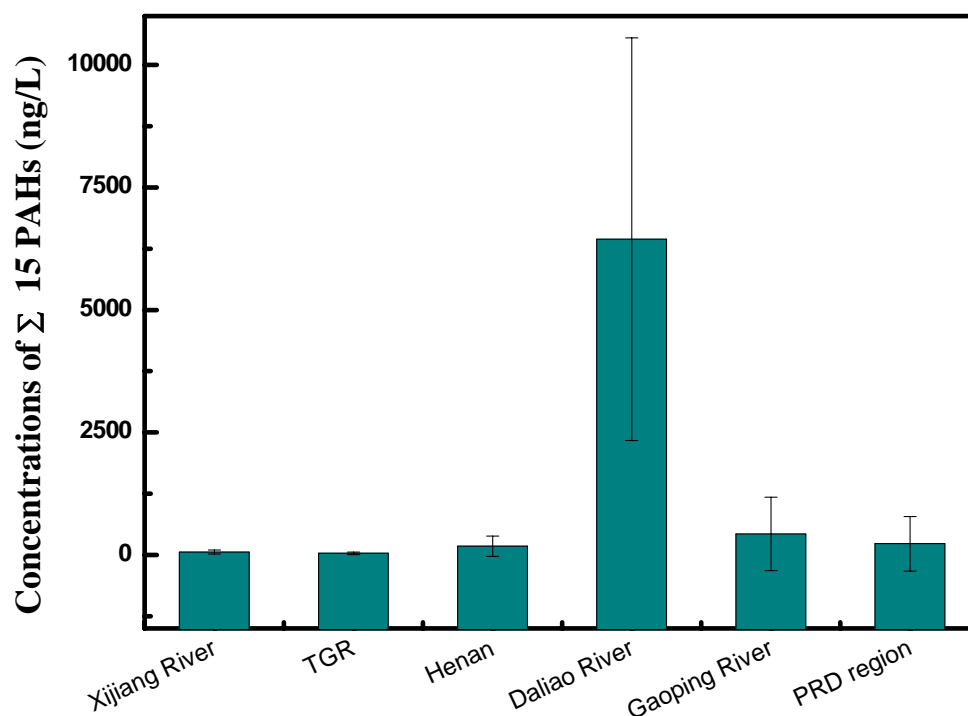



Fig. S2. The correlations between PAHs and total organic carbon (TOC)

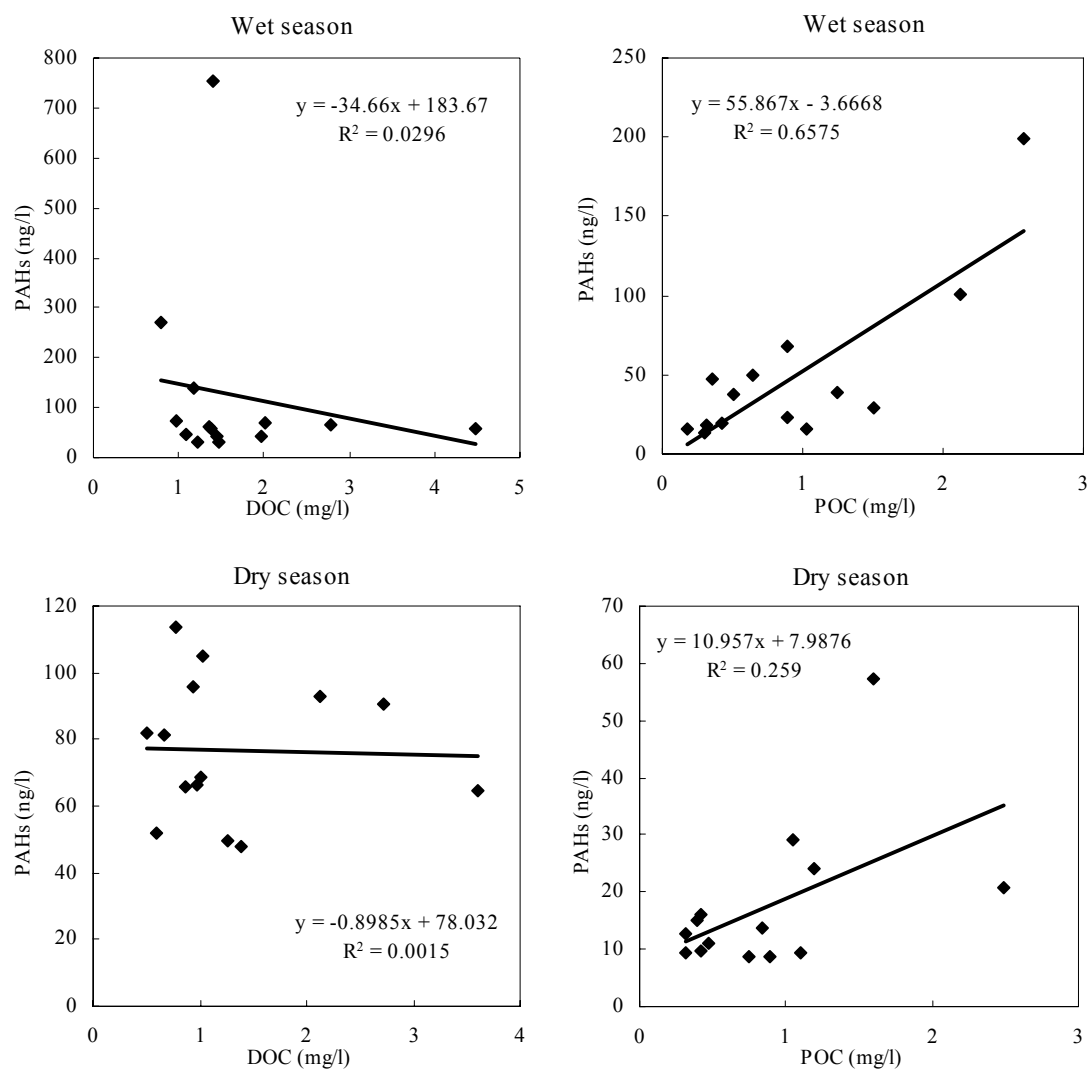

Fig. S3. Non-cancer hazard risks caused by individual PAHs through daily water consumption by people in the PRD region.

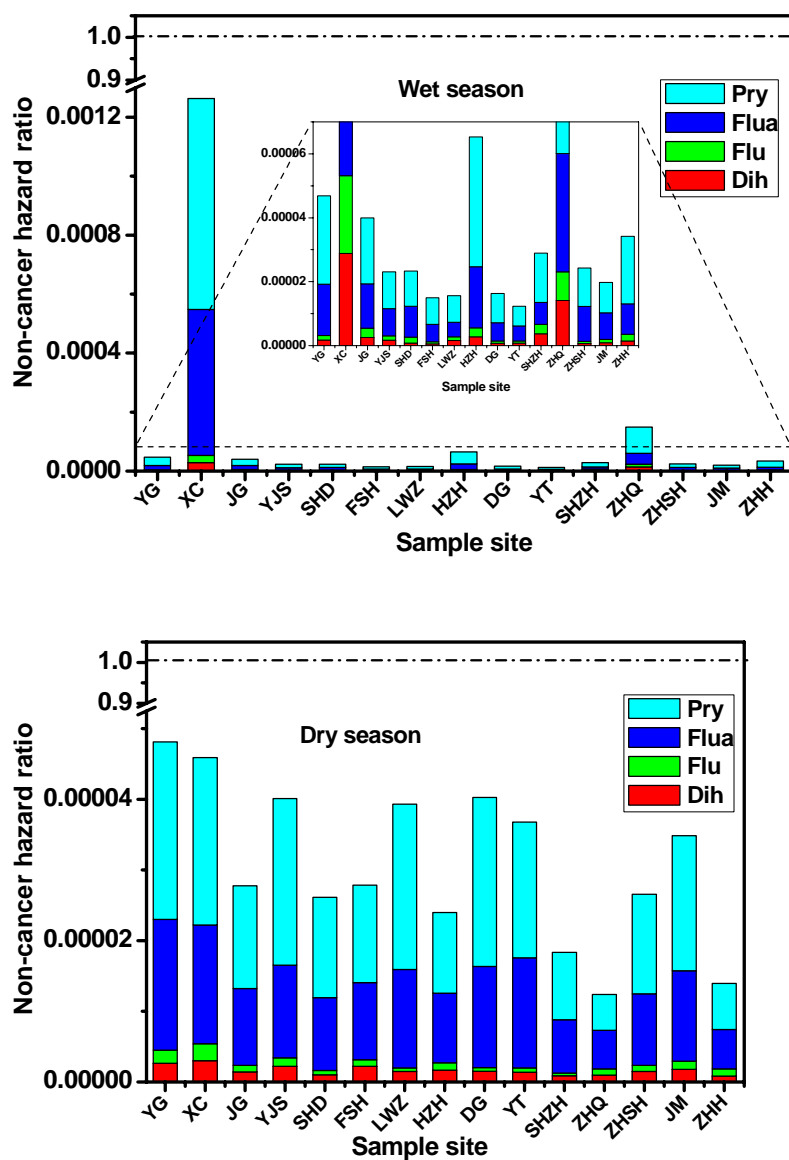

Fig. S4. Cancer hazard risks caused by BaP through daily water consumption by people in the PRD region.

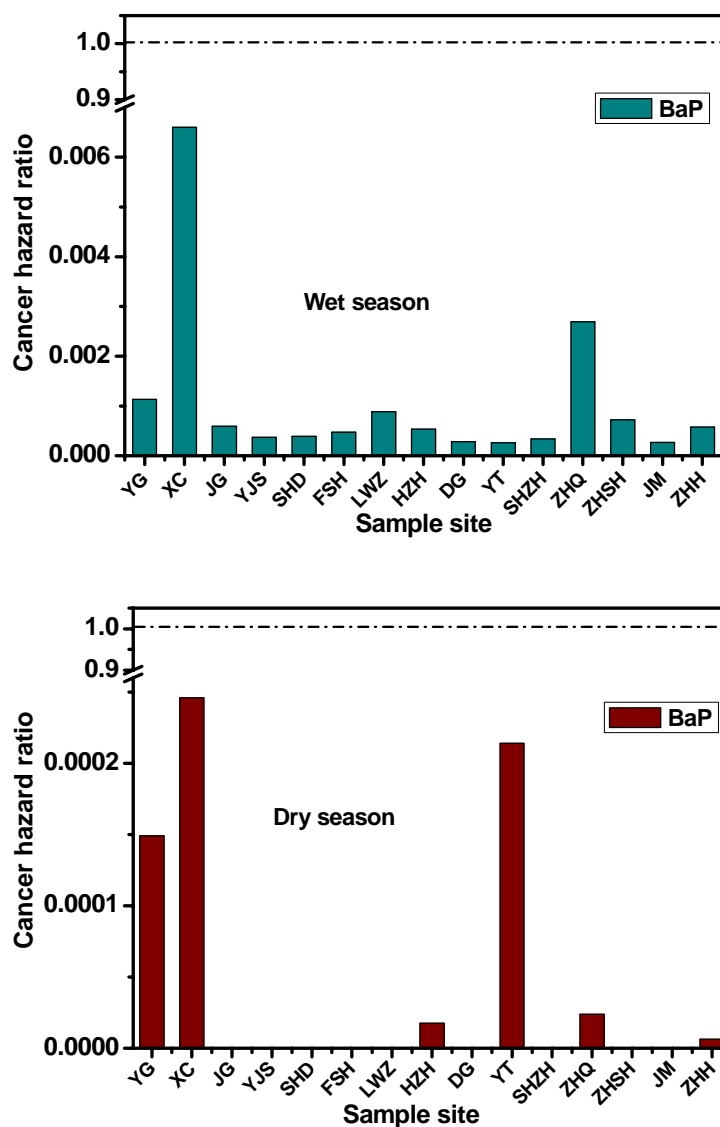

#### References:

1. B. A. Benner, S. A. Wise, L. A. Currie, G. A. Klouda, D. B. Klinedinst, R. B. Zweidinger, R. K. Stevens and C. W. Lewis, *Environmental Science and Technology*, 1995, **29**, 2382-2389.
2. H. Budzinski, I. Jones, J. Bellocq, C. Pierard and P. Garrigues, *Marine Chemistry*, 1997, **58**, 85-97.
3. P. M. Gschwend and R. A. Hites, *Geochimica Et Cosmochimica Acta*, 1981, **45**, 2359-2367.
4. E. Lipiatou and A. Saliot, *Marine Chemistry*, 1991, **32**, 51-71.
5. M. B. Yunker, R. W. Macdonald, R. Vingarzan, R. H. Mitchell, D. Goyette and S. Sylvestre, *Organic Geochemistry*, 2002, **33**, 489-515.
6. M. B. Fernandes, M. A. Sicre, A. Boireau and J. Tronczynski, *Marine Pollution Bulletin*, 1997, **34**, 857-867.
